# Supplementary material for: An improved fluorescent tag and its nanobodies for membrane protein expression, stability assay, and purification
Source: PubMed Central journal article supplement (PMC7729955; doi:10.1038/s42003-020-01478-z), 2020-12-10
Supplement: 42003_2020_1478_MOESM2_ESM.pdf [file 42003_2020_1478_MOESM2_ESM.pdf]

## **Description of Additional Supplementary Files**

File Name: Supplementary Data 1

Description: Source data for Fig. 1a, 1c, 1d, 1e, Fig. 2, Fig. 3a, 3b, 3e-3h, Fig. 4a, 4b, 4e-4h, Fig. 5a, 5c, 5d, 5e, 5g, 5h, Fig. 6a, 6c, 6d, 6e, 6g, 6h, and Fig. 7c-7f in an Excel file.
